# Supplementary material for: Effects of Land Cover Change on Vegetation Carbon Source/Sink in Arid Terrestrial Ecosystems of Northwest China, 2001–2018
Source: MDPI journal article supplement (doi:10.3390/rs15092471), 2023-05-08
Supplement: s1 [file s1]

Archive with 1 entries (1 files):
- remotesensing-2353663-supplementary.pdf
